# Supplementary material
Source: PubMed Central journal article supplement (PMC3988685)
Supplement: nn406166n_si_001.pdf [file nn406166n_si_001.pdf]

## Supplemental Materials

### **Surface Interactions with Compartmentalized Cellular Phosphates Explain Rare Earth Oxide Nanoparticle Hazard and Provide Opportunities for Safer Design**

Ruibin Li<sup>†</sup>, Zhaoxia Ji<sup>‡</sup>, Chong Hyun Chang<sup>‡</sup>, Darren R. Dunphy<sup>§</sup>, Xiaoming Cai<sup>⊥</sup>, Huan Meng<sup>†</sup>, Haiyuan Zhang<sup>‡</sup>, Bingbing Sun<sup>†</sup>, Xiang Wang<sup>‡</sup>, Juyao Dong<sup>⊥</sup>, Sijie Lin<sup>‡</sup>, Meiyang Wang<sup>†</sup>, Yu-Pei Liao<sup>†</sup>, C. Jeffrey Brinker<sup>§</sup>, Andre Nel<sup>†,‡,\*</sup>, and Tian Xia<sup>†,‡,\*</sup>

<sup>†</sup>Division of NanoMedicine, Department of Medicine, University of California, 10833 Le Conte Avenue, Los Angeles, California 90095, United States, <sup>‡</sup>California NanoSystems Institute, University of California, 570 Westwood Plaza, Los Angeles, California 90095, United States, <sup>§</sup>Department of Chemical and Nuclear Engineering, Engineering, University of New Mexico, University of New Mexico MSC01 1120, Albuquerque, New Mexico 87131, United States, <sup>⊥</sup>Department of Pharmacology, School of Medicine, University of California, 360 Med Surge II, Irvine, California 92697, <sup>⊥</sup>Department of chemistry & Biochemistry, University of California, 607 Charles E. Young Drive East, Los Angeles, California 90095, United States.

\*Corresponding Author: Tian Xia, Ph.D.; and Andre Nel, Ph.D.

Department of Medicine, Division of NanoMedicine, UCLA School of Medicine, 52-175 CHS, 10833 Le Conte Ave, Los Angeles, CA 90095-1680.

Tel: (310) 983-3359, Fax: (310) 206-8107

E-mail: [txia@ucla.edu](mailto:txia@ucla.edu)

[Anel@mednet.ucla.edu](mailto:Anel@mednet.ucla.edu)

**Table S1. Primary and Hydrodynamic Nanoparticle Sizes**

| Nanoparticles                  | Primary Size<br>(nm) | Hydrodynamic Size in Media (nm) |               |               |
|--------------------------------|----------------------|---------------------------------|---------------|---------------|
|                                |                      | Water                           | c-RPMI 1640   | PBS + BSA     |
| Al <sub>2</sub> O <sub>3</sub> | 14.7 ± 5.2*          | 492.3 ± 103.4                   | 313.6 ± 67.3  | 469.4 ± 34.7  |
| Bi <sub>2</sub> O <sub>3</sub> | 27.4 ± 8.7           | 676.5 ± 112.5                   | 590.1 ± 57.3  | 688.7 ± 26.6  |
| CeO <sub>2</sub>               | 18.3 ± 6.8*          | 413.5 ± 196.6                   | 306.8 ± 82.3  | 427.0 ± 50.3  |
| CoO                            | 71.8 ± 16.2*         | 1247.9 ± 244.8                  | 477.6 ± 76.6  | 1028.4 ± 42.4 |
| Co <sub>3</sub> O <sub>4</sub> | 10.0 ± 2.4*          | 166.0 ± 19.4                    | 261.9 ± 6.7   | 334.4 ± 53.6  |
| Cr <sub>2</sub> O <sub>3</sub> | 193.0 ± 90.0*        | 873.1 ± 343.8                   | 695.6 ± 165.4 | 534.9 ± 44.9  |
| CuO                            | 12.8 ± 3.4*          | 575.7 ± 265.4                   | 571.4 ± 96.0  | 505.4 ± 74.4  |
| Dy <sub>2</sub> O <sub>3</sub> | 37.5 ± 6.6           | 898.5 ± 452.6                   | 707.5 ± 170.5 | 705.3 ± 101.6 |
| Er <sub>2</sub> O <sub>3</sub> | 113.8 ± 37.8         | 385.4 ± 52.7                    | 362.6 ± 21.5  | 415.3 ± 27.8  |
| Eu <sub>2</sub> O <sub>3</sub> | 52.8 ± 11.7          | 601.9 ± 239.5                   | 504.8 ± 53.0  | 568.2 ± 32.5  |
| Fe <sub>2</sub> O <sub>3</sub> | 12.3 ± 2.9*          | 255.3 ± 14.2                    | 304.6 ± 27.8  | 282.7 ± 7.8   |
| Fe <sub>3</sub> O <sub>4</sub> | 12.0 ± 3.2*          | 346.2 ± 31.0                    | 415.7 ± 97.7  | 328.3 ± 75.3  |
| Gd <sub>2</sub> O <sub>3</sub> | 43.8 ± 15.8*         | 820.1 ± 277.5                   | 408.5 ± 17.9  | 814.1 ± 68.3  |
| HfO <sub>2</sub>               | 28.4 ± 7.3*          | 365.6 ± 20.3                    | 341.3 ± 9.4   | 303.5 ± 8.7   |
| In <sub>2</sub> O <sub>3</sub> | 59.6 ± 19.0*         | 236.3 ± 7.7                     | 225.8 ± 20.2  | 231.0 ± 29.5  |
| La <sub>2</sub> O <sub>3</sub> | 24.6 ± 5.3*          | 806.6 ± 339.2                   | 378.2 ± 33.1  | 821.8 ± 43.0  |
| Nd <sub>2</sub> O <sub>3</sub> | 133.8 ± 51.6         | 829.0 ± 78.7                    | 573.3 ± 93.8  | 660.6 ± 46.8  |
| NiO                            | 13.1 ± 5.9*          | 633.1 ± 116.7                   | 345.1 ± 16.4  | 366.5 ± 62.4  |
| Ni <sub>2</sub> O <sub>3</sub> | 140.2 ± 52.5*        | 664.4 ± 144.4                   | 468.6 ± 104.9 | 914.4 ± 255.5 |
| Sb <sub>2</sub> O <sub>3</sub> | 11.8 ± 3.8*          | 222.7 ± 8.4                     | 260.8 ± 20.7  | 253.2 ± 94.3  |
| Sm <sub>2</sub> O <sub>3</sub> | 108.3 ± 47.4         | 770.7 ± 96.3                    | 682.4 ± 78.4  | 762.4 ± 59.6  |
| SnO <sub>2</sub>               | 64.2 ± 13.2*         | 445.8 ± 161.8                   | 490.8 ± 178.9 | 473.3 ± 148.0 |
| TiO <sub>2</sub> -Anatase      | 12.6 ± 4.3*          | 203.5 ± 15.7                    | 307.6 ± 39.3  | 374.6 ± 122.9 |
| WO <sub>3</sub>                | 16.6 ± 4.3*          | 104.6 ± 4.6                     | 133.0 ± 6.1   | 118.2 ± 44.2  |
| Y <sub>2</sub> O <sub>3</sub>  | 32.7 ± 8.1*          | 1345.7 ± 194.9                  | 451.0 ± 117.1 | 659.1 ± 139.0 |
| Yb <sub>2</sub> O <sub>3</sub> | 61.7 ± 11.3*         | 513.3 ± 382.6                   | 330.9 ± 70.9  | 659.7 ± 227.3 |
| ZnO                            | 22.6 ± 5.1*          | 210.3 ± 2.3                     | 320.1 ± 4.9   | 453.4 ± 13.6  |
| ZrO <sub>2</sub>               | 40.1 ± 12.6*         | 494.4 ± 97.6                    | 214.3 ± 18.9  | 224.0 ± 27.4  |

\* Zhang *et al.* ACS Nano 2012, 6, 4369-4368.

**Table S2. Sources and Isoelectric Points of Nanoparticles**

| <b>Nanoparticles</b>               | <b>Vendor</b> | <b>IEP</b> | <b><math>\zeta</math> at pH 7.4 (mV)</b> |
|------------------------------------|---------------|------------|------------------------------------------|
| <b>Al<sub>2</sub>O<sub>3</sub></b> | Meliorum      | 7.4        | 0                                        |
| <b>Bi<sub>2</sub>O<sub>3</sub></b> | Lutz Madler*  | 2.0        | -22.7                                    |
| <b>CeO<sub>2</sub></b>             | Meliorum      | 7.8        | 21.4                                     |
| <b>CoO</b>                         | US-Nano       | 9.2        | 21.6                                     |
| <b>Co<sub>3</sub>O<sub>4</sub></b> | Lutz Madler   | 9.4        | 24.6                                     |
| <b>Cr<sub>2</sub>O<sub>3</sub></b> | US Nano       | 5.3        | -32.6                                    |
| <b>CuO</b>                         | Lutz Madler   | 7.9        | 7.6                                      |
| <b>Dy<sub>2</sub>O<sub>3</sub></b> | US-Nano       | 6.8        | -16.0                                    |
| <b>Er<sub>2</sub>O<sub>3</sub></b> | US-Nano       | 7.4        | -1.7                                     |
| <b>Eu<sub>2</sub>O<sub>3</sub></b> | US-Nano       | 7.7        | 4.5                                      |
| <b>Fe<sub>2</sub>O<sub>3</sub></b> | US Nano       | 7.2        | -2.1                                     |
| <b>Fe<sub>3</sub>O<sub>4</sub></b> | Lutz Madler   | 5.0        | -31.0                                    |
| <b>Gd<sub>2</sub>O<sub>3</sub></b> | NanoAmor      | 8.0        | 6.5                                      |
| <b>HfO<sub>2</sub></b>             | US-Nano       | 8.1        | 33.5                                     |
| <b>In<sub>2</sub>O<sub>3</sub></b> | US-Nano       | 9.2        | 61.9                                     |
| <b>La<sub>2</sub>O<sub>3</sub></b> | NanoAmor      | 9.4        | 54.3                                     |
| <b>Nd<sub>2</sub>O<sub>3</sub></b> | NanoAmor      | 6.4        | -18.3                                    |
| <b>NiO</b>                         | Sigma         | 11.4       | 27.6                                     |
| <b>Ni<sub>2</sub>O<sub>3</sub></b> | US-Nano       | 8.3        | 32.2                                     |
| <b>Sb<sub>2</sub>O<sub>3</sub></b> | Lutz Madler   | 1.0        | -35.3                                    |
| <b>Sm<sub>2</sub>O<sub>3</sub></b> | US-Nano       | 7.0        | -5.7                                     |
| <b>SnO<sub>2</sub></b>             | US Nano       | 4.0        | -38.8                                    |
| <b>TiO<sub>2</sub>-Anatase</b>     | Lutz Madler   | 6.4        | -30.4                                    |
| <b>WO<sub>3</sub></b>              | Lutz Madler   | 0.3        | -61.3                                    |
| <b>Y<sub>2</sub>O<sub>3</sub></b>  | Meliorum      | 9.6        | 42.7                                     |
| <b>Yb<sub>2</sub>O<sub>3</sub></b> | MK-Nano       | 8.2        | 9.9                                      |
| <b>ZnO</b>                         | Lutz Madler   | 9.6        | 28.8                                     |
| <b>ZrO<sub>2</sub></b>             | US-Nano       | 5.8        | -12.8                                    |

\*IWT Foundation Institute of Materials Science, Department of Production Engineering, University of Bremen, Bremen, Germany.

## **Methods**

### **S-1 Preparation of fluorophore loaded liposomes**

Propidium iodide (PI) encapsulating liposomes were synthesized according to film rehydration method using a mini-extruder equipped with PC membrane of 100 nm pore (Avanti Polar Lipids, Alabama)<sup>1</sup>. Briefly, 10 mg of phosphatidic acid (Avanti, Alabaster, Alabama, USA) was dissolved in 5 mL CHCl<sub>3</sub> in a 50 mL round flask. Lipid films were made by evaporation for ~30 min, using a rotary evaporator connected to a vacuum system at room temperature. The resulting thin lipid film was placed in a chemical hood overnight to remove trace amounts of organic solvents. Subsequently, 5 mL of MOPS buffer (10 mM 3-(N-morpholino) propanesulfonic acid, 60 mM NaCl, pH 7.0) at PI concentration of 50 µg/mL was added to the flask and incubated at 37 °C for 2 h. In order to make homogeneous unilamellar liposomes, the multi-lamellar liposomes were repeatedly extruded at a 100 nm pore size, 11 times. In order to remove the non-trapped PI, the solution was centrifuged at 100,000 rpm for 30 min to collect the pellet, which was resuspended in 10 mL saline buffer to yield a PI loaded liposome suspension. The liposome was characterized for size, size distribution, and zeta potential before use.

### **S-2 LC-MS analysis of phospholipids**

Liquid chromatography (LC)-MS analysis was performed with a Surveyor LC system coupled to a LTQ-FTMS that includes electrospray ionization source (ESI) (Thermo Fisher Scientific, Waltham, MA). The MS was operated in ESI+ ionization mode with data collection from m/z 100 to 1200. For LC separation, a Luna C5 column (2.1 × 50 mm, 100 Å, 5 µm, Phenomenex, Los Angeles, CA) was employed with column and auto-sampler temperatures maintained at 25 °C and 4 °C, respectively. Injection volumes were 3 µL. The column was eluted with a gradient of mobile phase A (methanol:50 mM ammonium formate 5:95) and mobile phase B (isopropanol:methanol:50 mM ammonium formate 60:35:5) as follows: 100% A for 5 min at 0.1 ml/min; 0-100% B over 15 min at 0.4 ml/min; 100% B for 5 min at 0.5 ml/min; 0-100% A for 5 min at 0.4 ml/min. 0.1% formic acid was added to improve the ionization.

External calibration of the FTMS was carried out with a standard LTQ calibration mixture (Thermo Scientific, Waltham, MA). The following settings were used for the FTMS: vaporizer temperature, 280 °C; sheath and auxiliary gases, 35 and 15 (arbitrary units); spray voltage, 3.5

kV; capillary temperature, 350 °C; capillary voltage, 10 V; tube-lens voltage, 120 V; maximum injection time, 1000 ms; maximum number of ions collected for each scan,  $5 \times 10^5$ ; mass resolution of 100,000. MS data were recorded in centroid mode. Accurate masses of phospholipids were extracted with a mass tolerance of 10 ppm in the total ion chromatogram (TIC).

### **S-3 Lung inflammation and fibrosis in mice**

Eight-week-old male C57Bl/6 mice purchased from Charles River Laboratories (Hollister, CA) were used for animal experiments. All animals were housed under standard laboratory conditions that have been set up according to UCLA guidelines for care and treatment of laboratory animals as well as the NIH Guide for the Care and Use of Laboratory Animals in Research (DHEW78-23). These conditions were approved by the Chancellor's Animal Research Committee at UCLA and include standard operating procedures for animal housing (filter-topped cages; room temperature at  $23 \pm 2$  °C; 60% relative humidity; 12 h light, 12 h dark cycle) and hygiene status (autoclaved food and acidified water). Animals were exposed by oropharyngeal aspiration as described by us<sup>2</sup>. Briefly, animals were anesthetized by intraperitoneal injection of ketamine (100 mg/kg)/xylazine (10 mg/kg) in a total volume of 100  $\mu$ L. The anesthetized animals were held in a vertical position. 50  $\mu$ L aliquots of the nanoparticle suspensions in PBS were instilled at the back of the tongue to allow pulmonary aspiration of a dose of 2 mg/kg. Each experiment included control animals, which received the same volume of PBS. The positive control in each experiment received 5 mg/kg MUS. Each group included six mice. The mice were sacrificed after 21 days. BALF and lung tissue were collected as previously described. The BALF was used for performance of total and differential cell counts and measurement of IL-1 $\beta$ , TGF- $\beta$ 1 and PDGF-AA levels. Lung tissue was stained with hematoxylin/eosin or with Masson's Trichrome stain, and was homogenized with a Tissuemiser homogenizer (Fisher Scientific) for the assessment of the total collagen content in each lung (Sircol Collagen Assay, UK).

## Figure legends

### **Figure S1. Morphological changes and dissolution of REO nanoparticles in PSF and acidic solutions.**

A) Morphological changes of the nanoparticles after exposure to PSF. The particles were suspended in H<sub>2</sub>O or PSF at 50 µg/mL and incubated at 37 °C for 24 h. After washing with DI H<sub>2</sub>O, particle morphology was observed by TEM. B) Morphology of pure La<sub>2</sub>O<sub>3</sub> and as-received La<sub>2</sub>O<sub>3</sub> in PSF or acidic phosphate solution at 50 µg/mL. Pure La<sub>2</sub>O<sub>3</sub> was prepared by calcining the as-received La<sub>2</sub>O<sub>3</sub> at 825 °C. Both pure and as-received La<sub>2</sub>O<sub>3</sub> were dispersed in PSF or 50 mM phosphate solution (pH 4.5) at 37 °C for 24 h. Morphological changes were observed by TEM. C) Dissolution amounts of REOs in water and acidic solution (HCl, pH 4.5). Nanoparticles were dispersed in water or HCl solution at 50 µg/mL, and incubated for 24 h at 37 °C. After centrifugation at 15,000 rpm for 10 min, the supernatant was collected to determine the dissolved metal content using ICP-OES.

### **Figure S2. Subcellular localization and bio-transformation of REOs in THP-1 lysosomes.**

A) Subcellular nanoparticle distribution in THP-1 cells as visualized by confocal microscopy. After cellular incubation with 12.5 µg/mL FITC-labeled nanoparticles for 12 h, the cells were washed with PBS and fixed in 4% paraformaldehyde. The nuclei were stained with Hoechst 33342 dye and the lysosomes were visualized using Alexa fluor 594-conjugated LAMP1 antibody. B) REO nanoparticle biotransformation in THP-1 cells as observed by TEM. THP-1 cells were treated with REOs at 50 µg/mL for 24 h, followed by washing, fixing and staining to prepare the TEM grids as described previously<sup>3</sup>.

### **Figure S3. Establishment of a nanoparticle library that includes 10 REOs and 18 non-REO metal oxides, and comparison of their inflammatory potential**

A) TEM images of the 28 nanoparticles used in this study. The particles were suspended in water at 50 µg/mL, and a drop of each particle suspension was placed on TEM grids. After drying at room temperature, the grids were observed under TEM. B) Particle endotoxin levels as determined by a standard Lonza LAL assay. All the materials exhibited endotoxin levels that are below the FDA standard for sterile water. C) Cell viability determined by MTS assay on THP-1 cells exposed to 0-50 µg/mL metal oxide particles for 24 h. D) IL-1β dose response following particle exposure for 24 h, as described

in Fig. 2B. E) Cellular uptake in THP-1 cells w/ or w/o cytochalasin D treatment. After pre-treatment by 5 µg/mL cytochalasin D for 3 h, THP-1 cells were exposed to 12.5 µg/mL FITC-labeled nanoparticles for 12 h. After thorough washing, cells were analyzed by confocal microscopy or flow cytometry to determine the abundance of cellular uptake. F) IL-1β release from THP-1 cells in the presence of cytochalasin D. IL-1β was measured in THP-1 cells pretreated with 5 µg/mL cytochalasin D for 3 h and then incubated with 50 µg/mL nanoparticles for an additional 6 h. G) IL-1β release from THP-1 cells in the presence of the cathepsin B inhibitor, CA-074-Me. After pre-treatment by 50 µM CA-074-Me for 3 h, THP-1 cells were incubated with 50 µg/mL REOs for an additional 6 h. H) IL-1β release by selected nanoparticles in wild type, NLRP3 or ASC knockout THP-1 cells. Cells were exposed to 50 µg/mL nanoparticles for 6 h. IL-1β was detected by ELISA assay. \* p < 0.05 compared to untreated wild THP-1 cells, # p < 0.05 compared to wild type THP-1 cells treated with nanoparticles

#### **Figure S4. Assessment of PDGF-AA production in a cellular co-culture system**

Co-culture of THP-1 and BEAS-2B cells to detect PDGF-AA production in Corning HTS Transwell-96 plates (Corning, NY, USA), in which the upper and lower chambers are separated by a filter with 1.0 µm pore size<sup>2</sup>. Briefly, THP-1 ( $1 \times 10^4$ ) and BEAS-2B cells ( $1 \times 10^4$ ) were seeded in the upper and lower chamber of the transwell system, respectively. After overnight incubation, both chambers received 50 µg/mL of the indicated nanoparticle suspensions were then combined for 24 h. The supernatants were collected and used to measure PDGF-AA by a PDGF-AA Quantikine ELISA kit (R&D, MN, USA). The antibody in this can detect both the specific human and mouse growth factors. \* p < 0.05 compared to Ctrl.

#### **Figure S5. Schematic to illustrate the possible mechanisms of membrane damage by REOs**

One possible mechanism could be the effect of nanoparticle shape, namely that the needle-like crystals on the transformed nanoparticles surface could pierce the lysosomal membrane. The second possibility is dephosphorylation of the phospholipids in the lipid bilayer, leading to disruption of the liposomal membrane.

#### **Figure S6. IL-1β production as well as cellular uptake in THP-1 cells incubated with non-treated or PSF-treated nanoparticles**

A) Cellular uptake of nanoparticles determined by ICP-OES. After 12 h treatment with 50  $\mu\text{g}/\text{mL}$  nanoparticles, THP-1 cells were washed three times and lysed. The protein concentration in the lysate supernatants was determined by Bradford method and the metal elements in lysis solutions were measured by ICP-OES.<sup>4</sup> B) IL-1 $\beta$  production in THP-1 cells treated with 50  $\mu\text{g}/\text{mL}$  nanoparticles for 24 h. PSF-treated nanoparticles were prepared by incubating nanoparticles in PSF for 24 h.

**Figure S7. Hemolysis dose-response in RBCs induced by nanoparticles**

A hemolysis assay was performed in RBCs treated with 50, 100, 200 and 400  $\mu\text{g}/\text{mL}$  nanoparticles in saline w/ or w/o phosphate, as described in Fig. 3B.

**Figure S8. Sub-chronic effects of the REO nanoparticles in the mouse lung.**

A) Differential cell counts in bronchoalveolar lavage fluid (BALF) 21 days after the animal exposure to a one-time instillation of 2 mg/Kg of the nanoparticles. B) H&E staining of lung tissues. \*  $p < 0.05$  compared to Ctrl.

**Figure S9. Cellular uptake of uncoated and phosphate-coated REO nanoparticles**

Phosphate-coated REO particles were prepared as described in Fig. 5. THP-1 cells were incubated with 50  $\mu\text{g}/\text{mL}$  REO nanoparticles w/ or w/o phosphate coating for 12 h. Then the metal elements were determined in cell lysis by ICP-OES.

**Figure S10. Cytokine production in BALF and total collagen in lungs exposed to phosphate-coated REOs after 21 days**

A) Assessment of IL-1 $\beta$ , TGF- $\beta$ 1 and PDGF-AA levels in the BALF 21 days after exposure to 2 mg/kg La<sub>2</sub>O<sub>3</sub>, Gd<sub>2</sub>O<sub>3</sub>, phosphate-coated La<sub>2</sub>O<sub>3</sub> or phosphate-coated Gd<sub>2</sub>O<sub>3</sub>. B) Trichrome staining of the lung tissue. \*  $p < 0.05$  compared to uncoated REOs.



**Figure S1**

**A**

**Morphological changes of REOs in PSF**

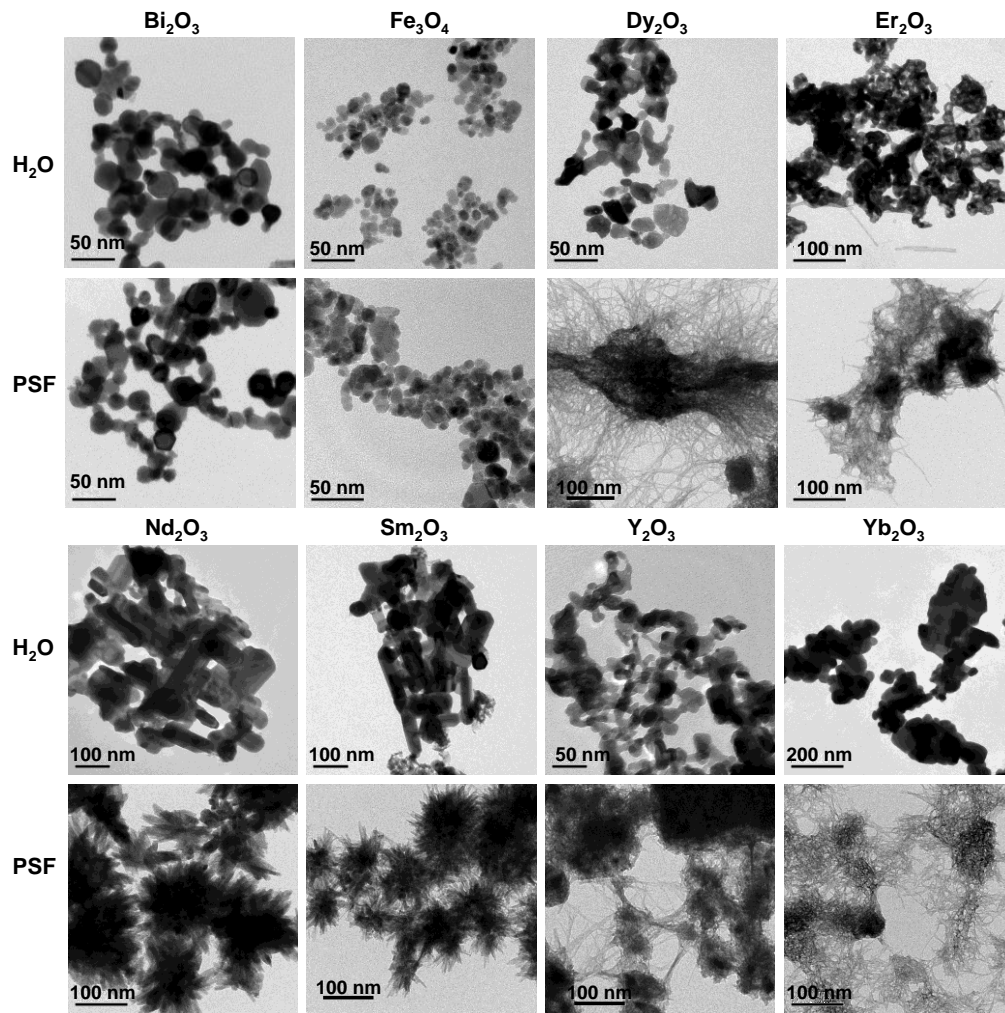

**B**

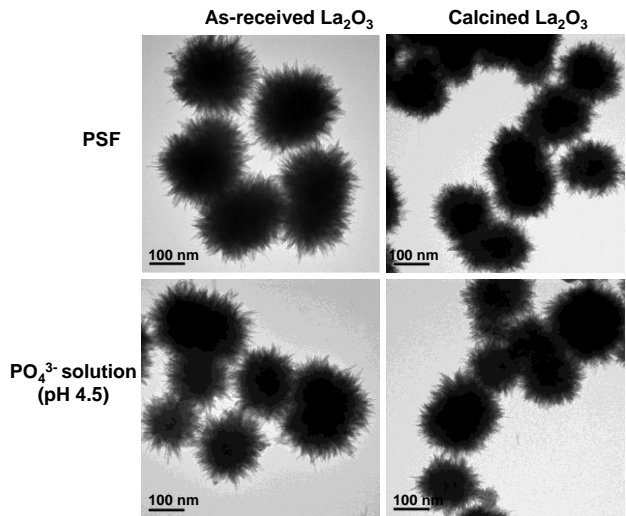

**C**

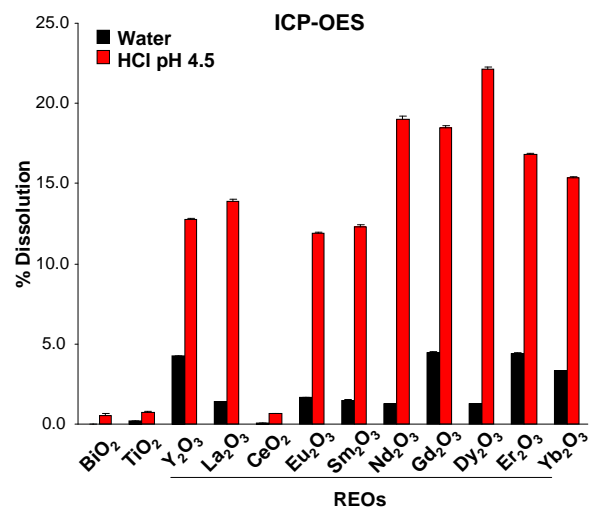

Figure S2

A

Cellular uptake of nanoparticles in THP-1 cells

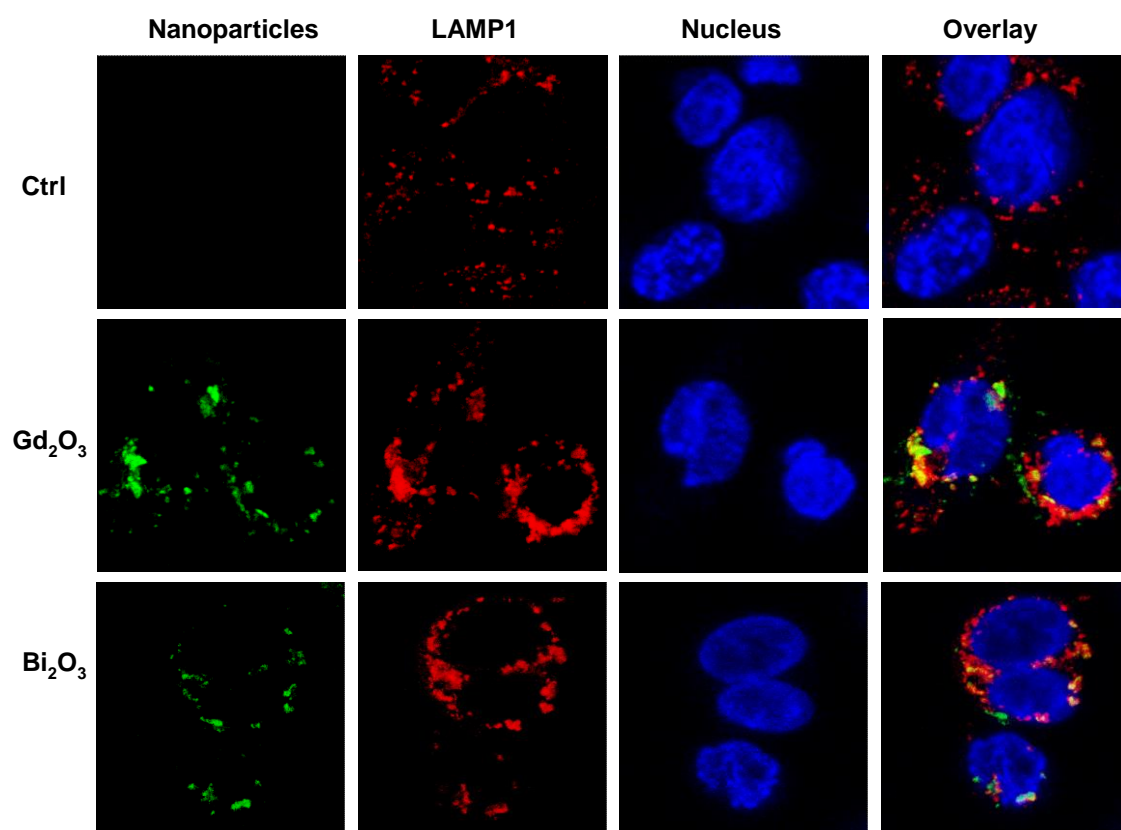

B

Bio-transformation of REOs in THP-1 cells

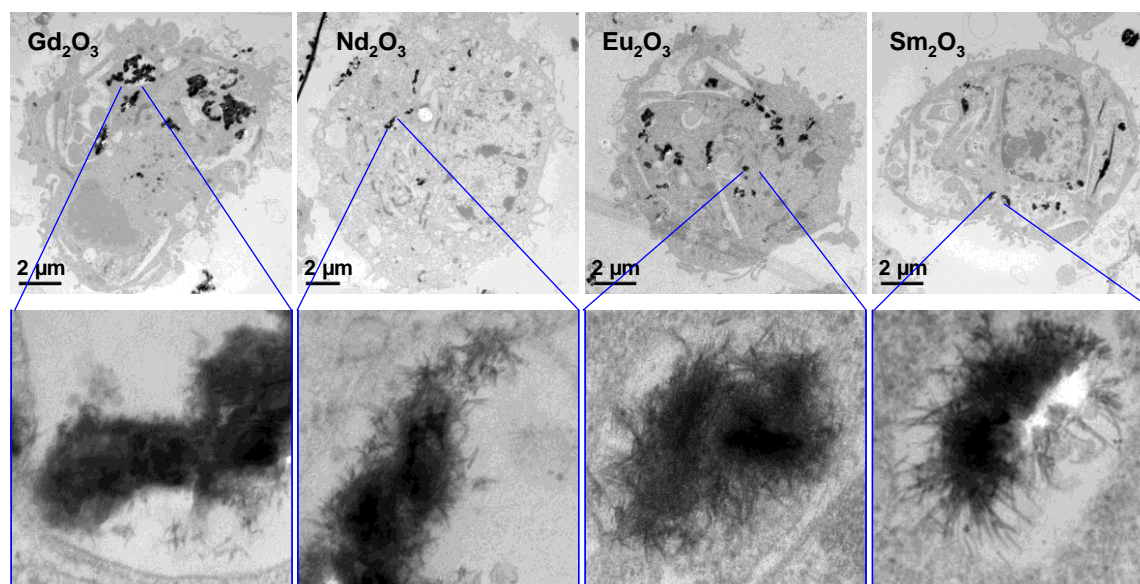

Figure S3

A

Metal oxide nanoparticle library

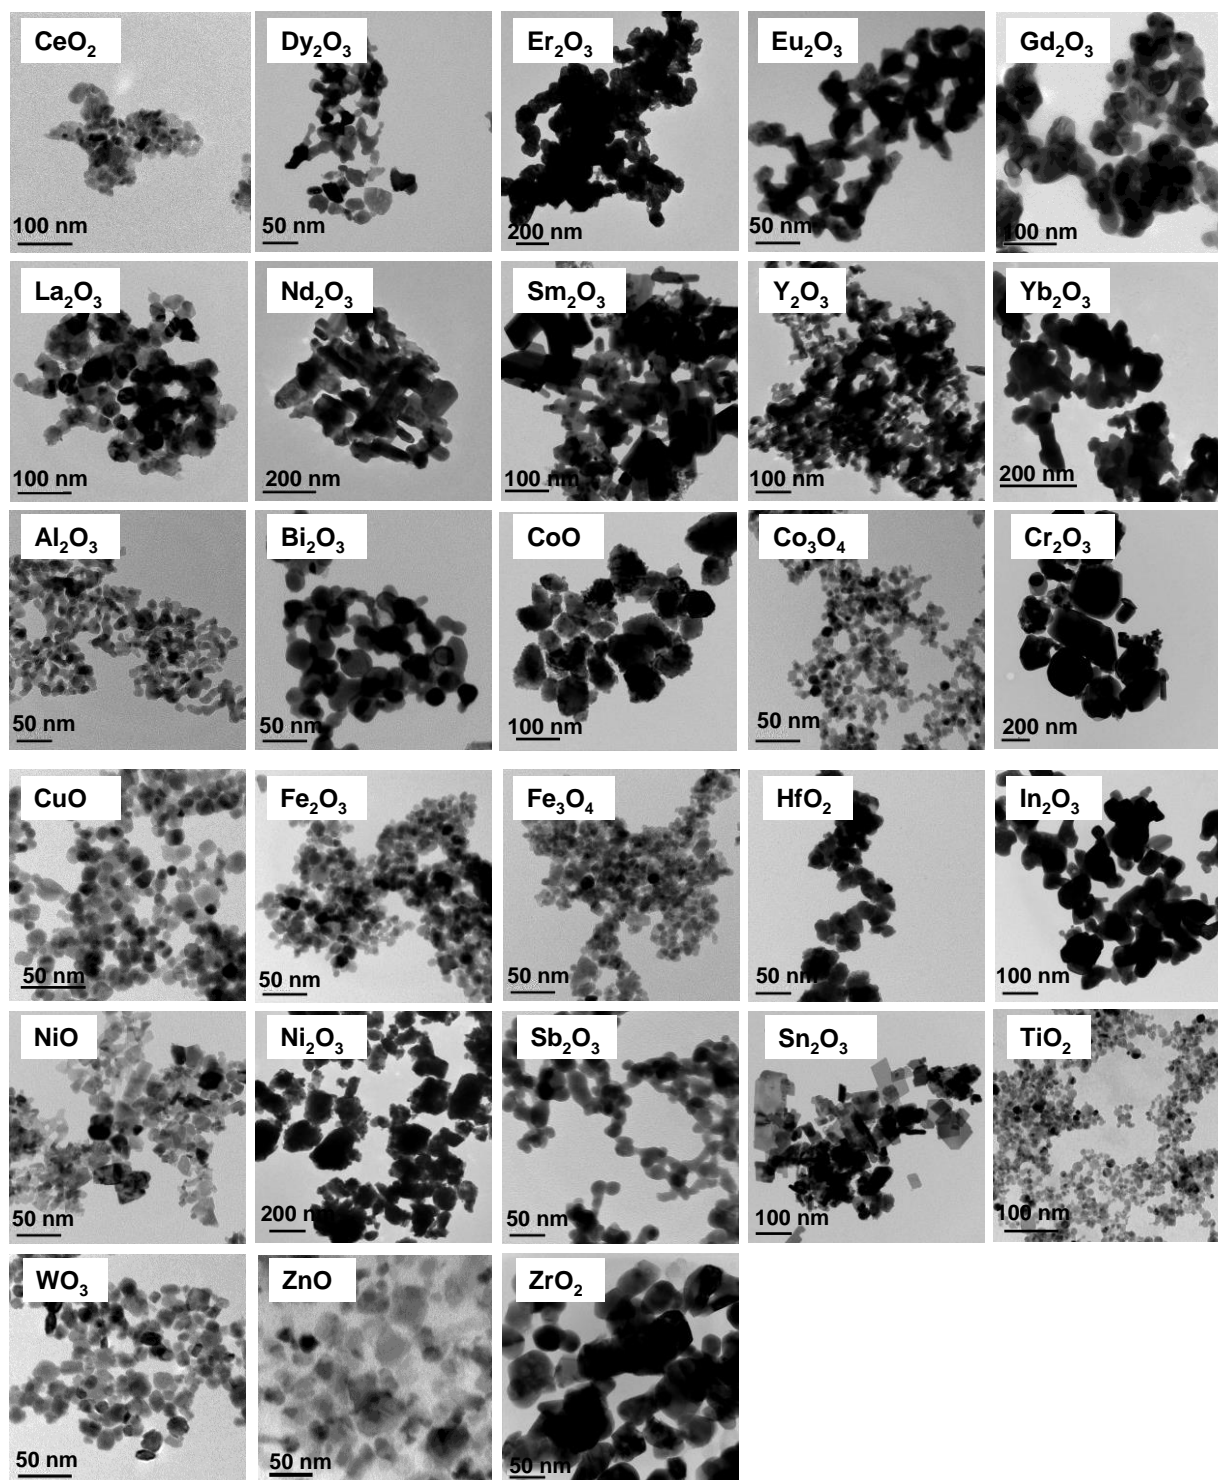

**B**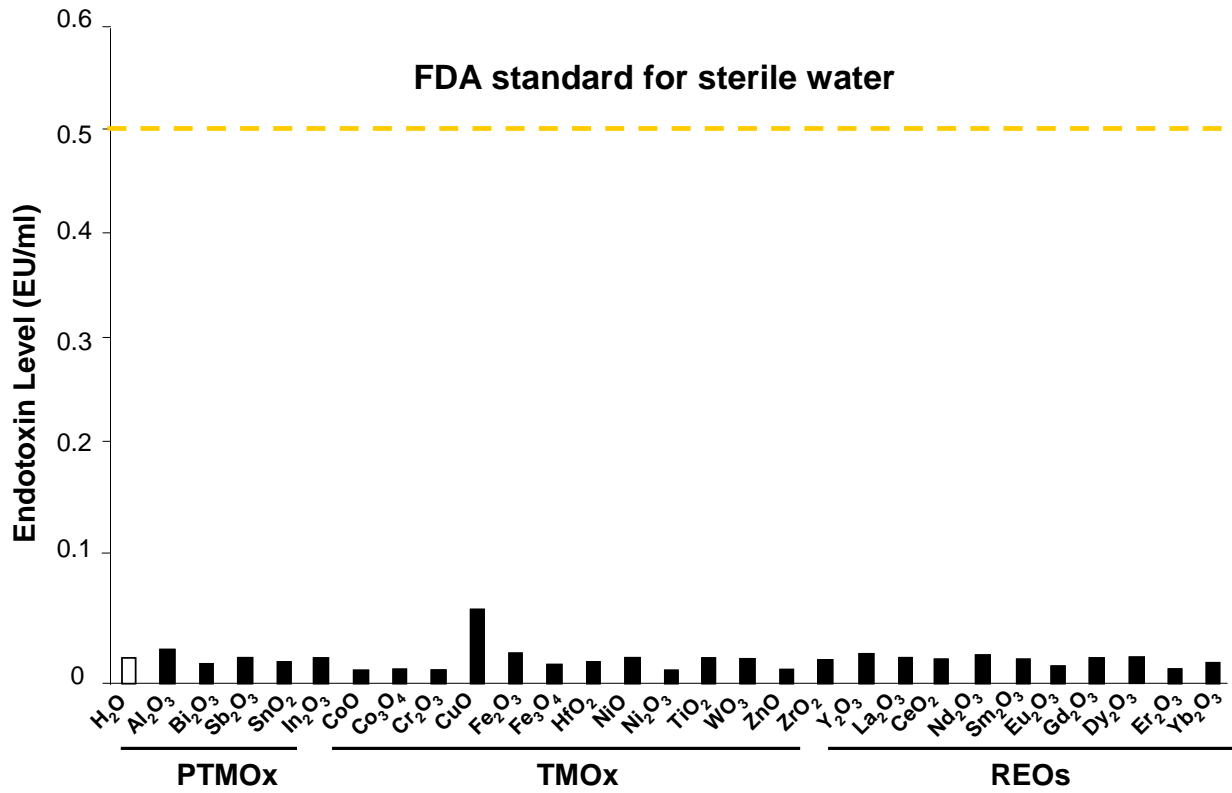**C**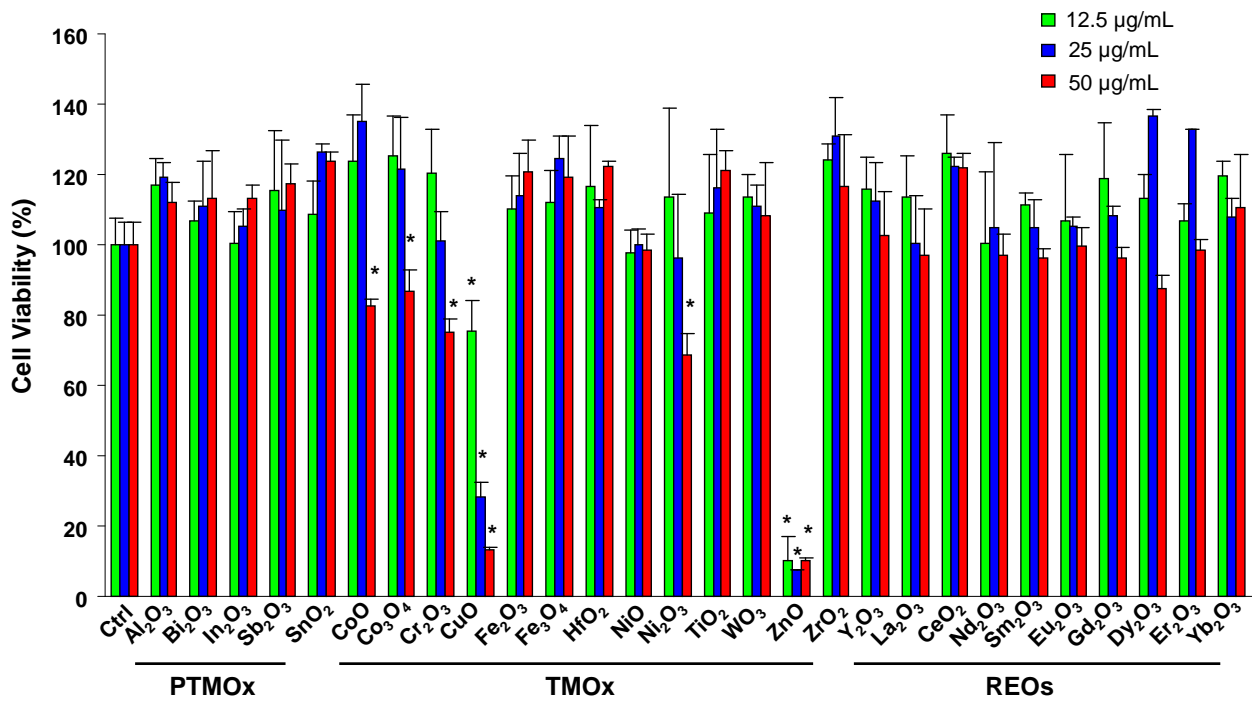

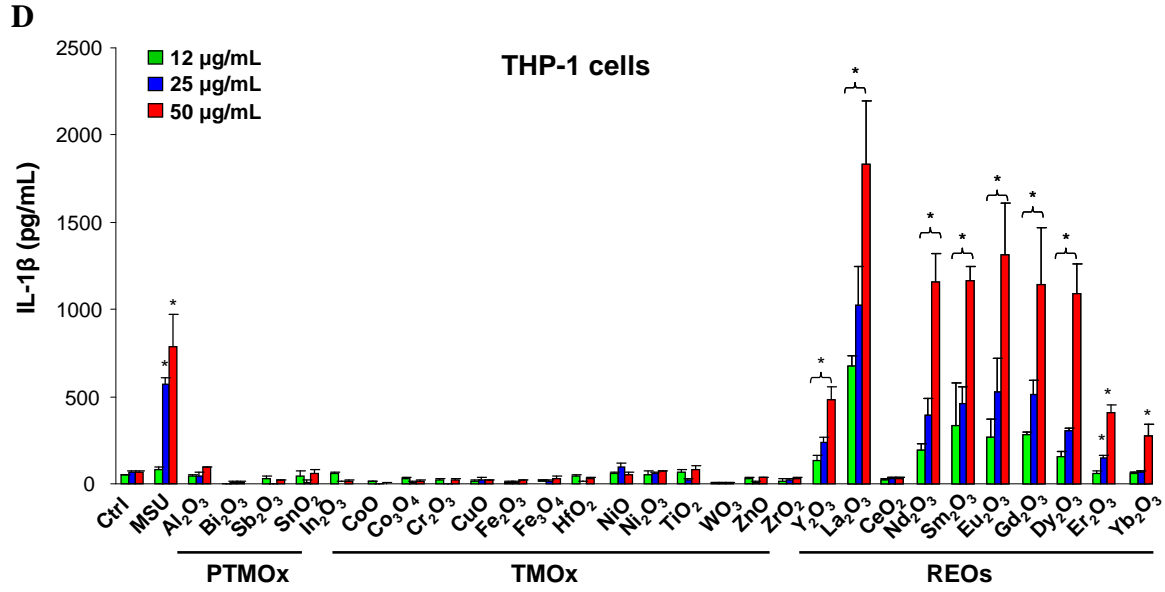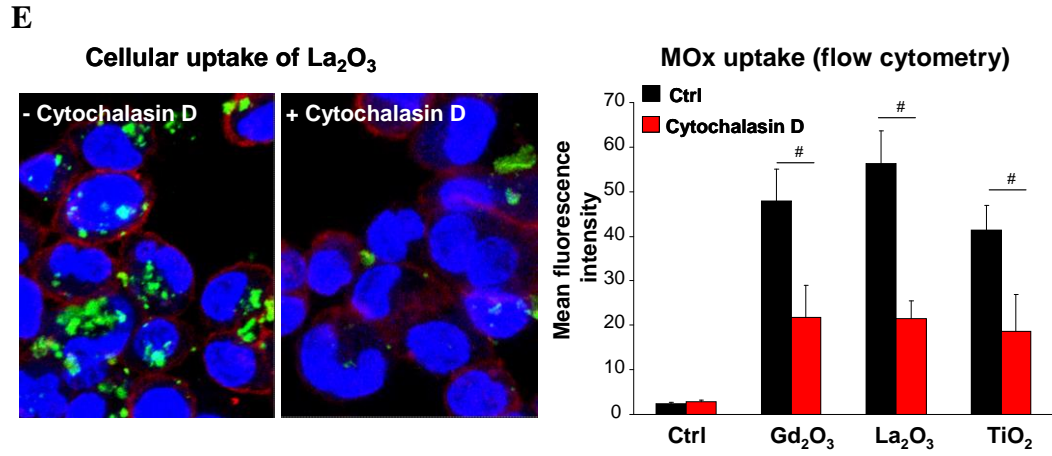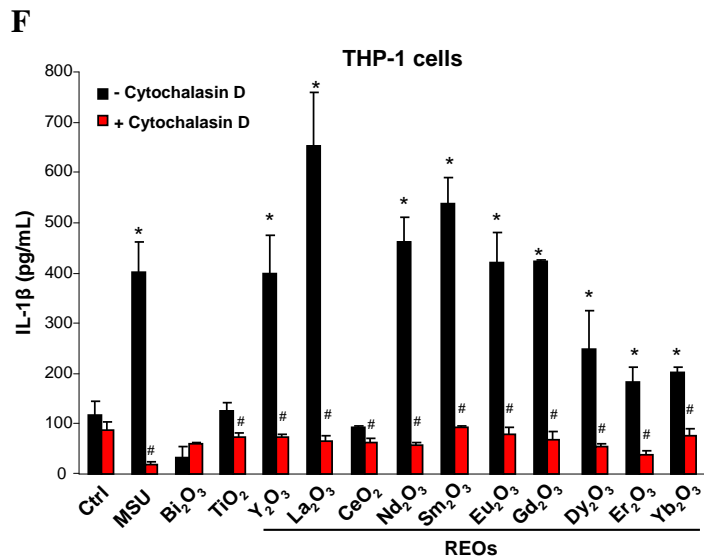

**G**

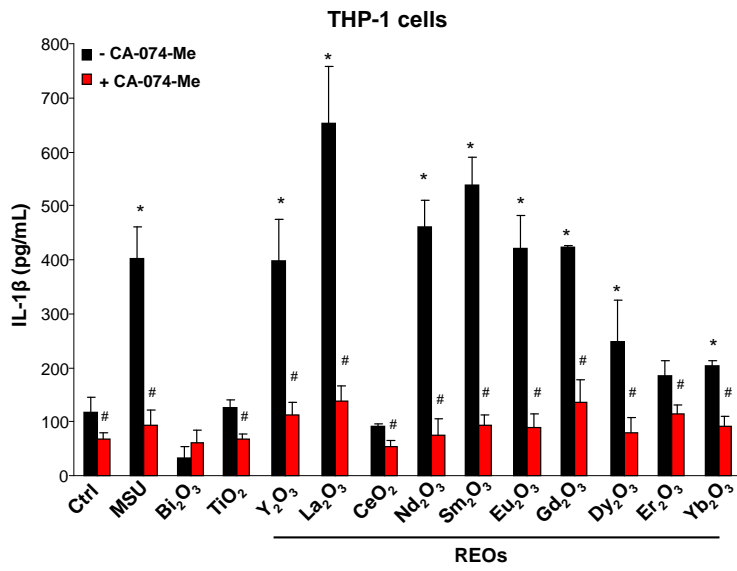

**H**

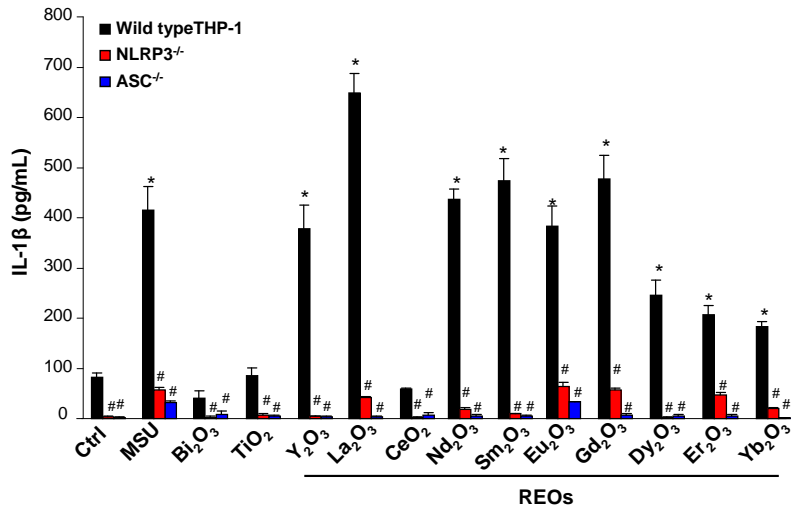

Figure S4

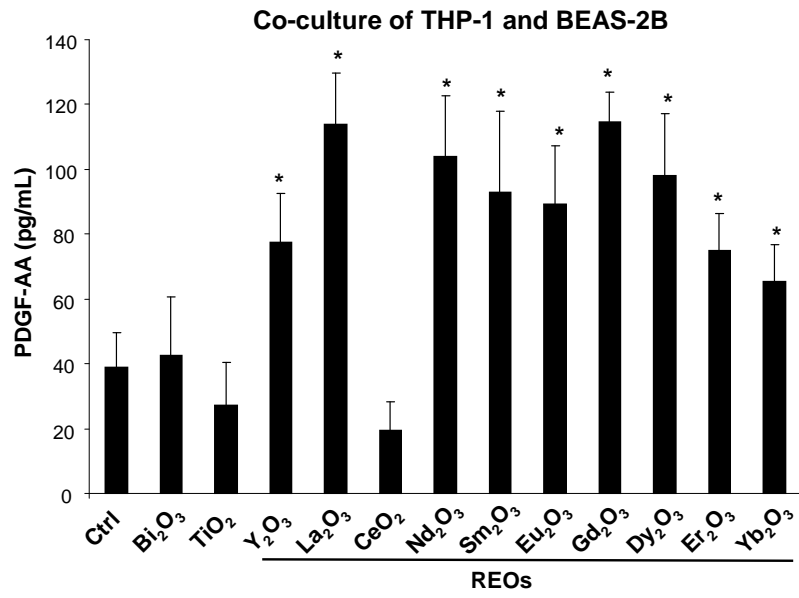



Figure S5

Possible mechanisms of membrane damage

Shape Effect

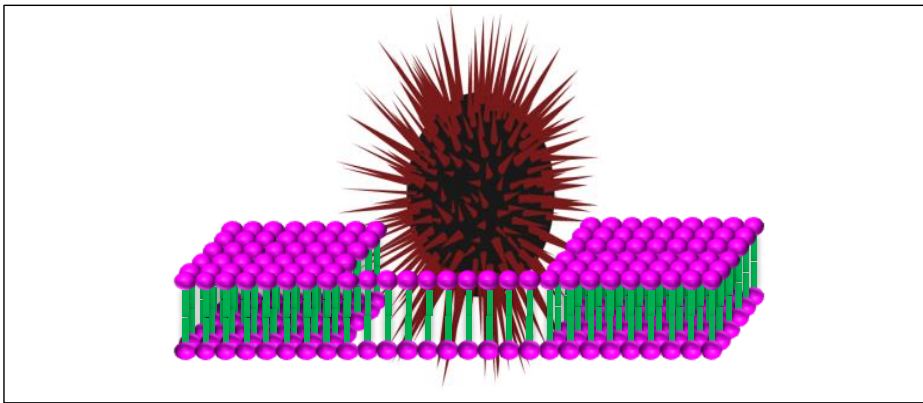

Dephosphorylation Effect

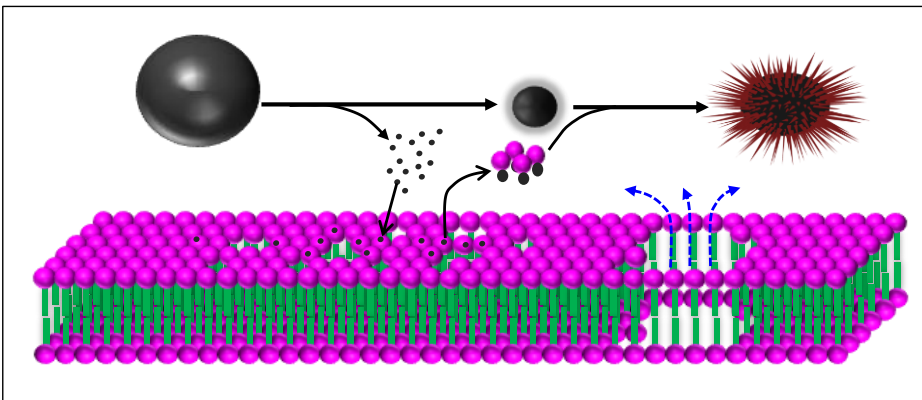



Figure S6

A

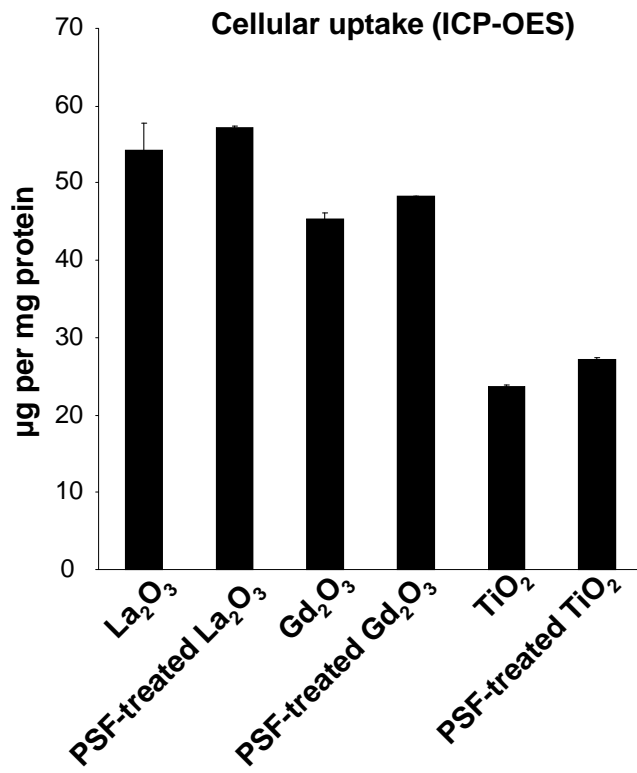

B

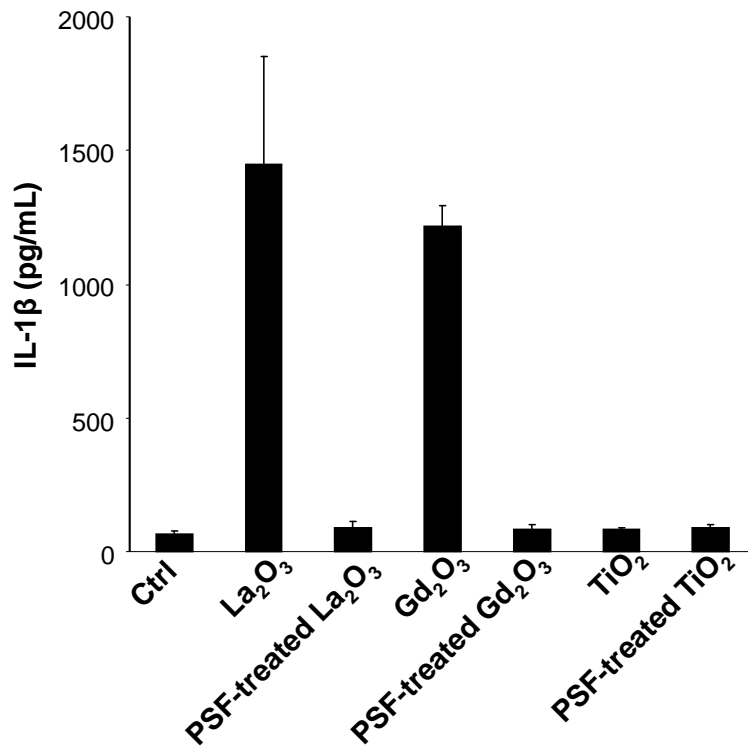

Figure S7

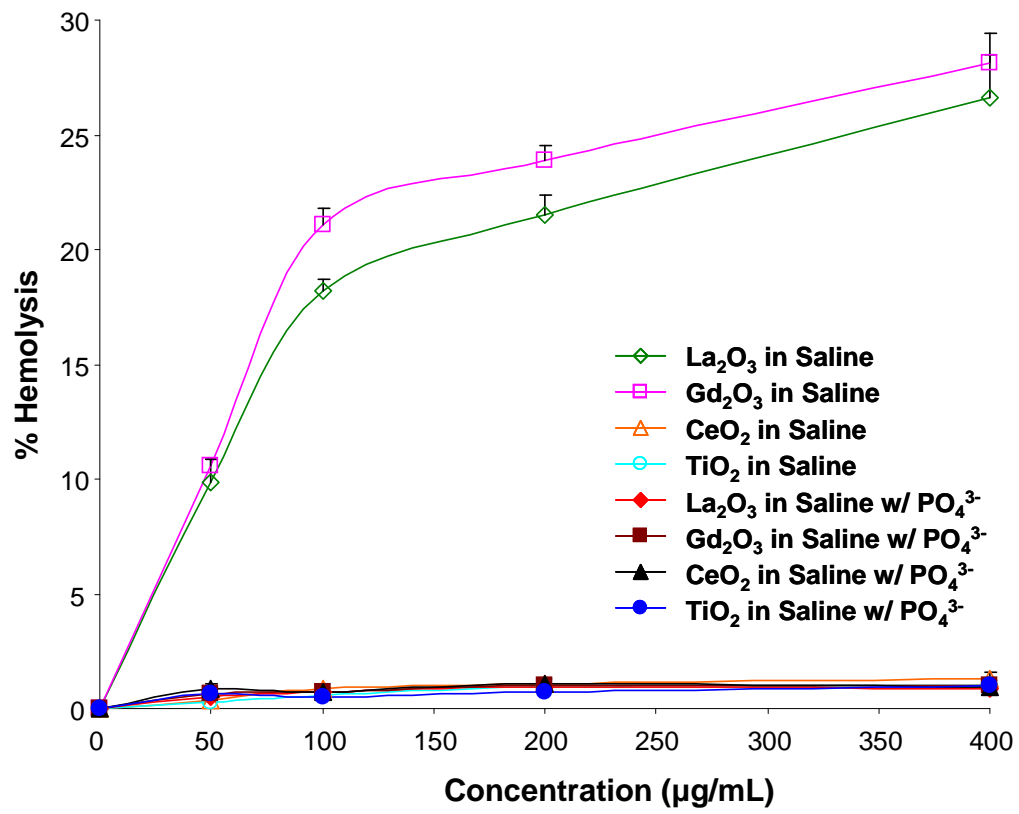

Figure S8

A

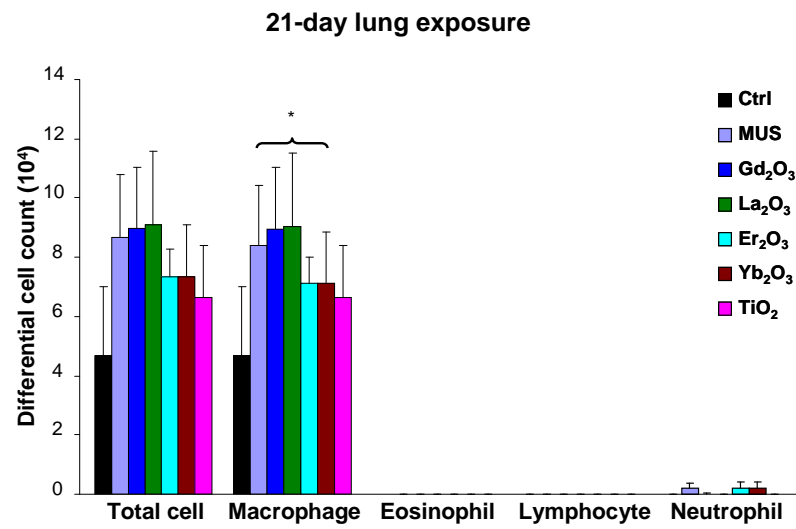

B

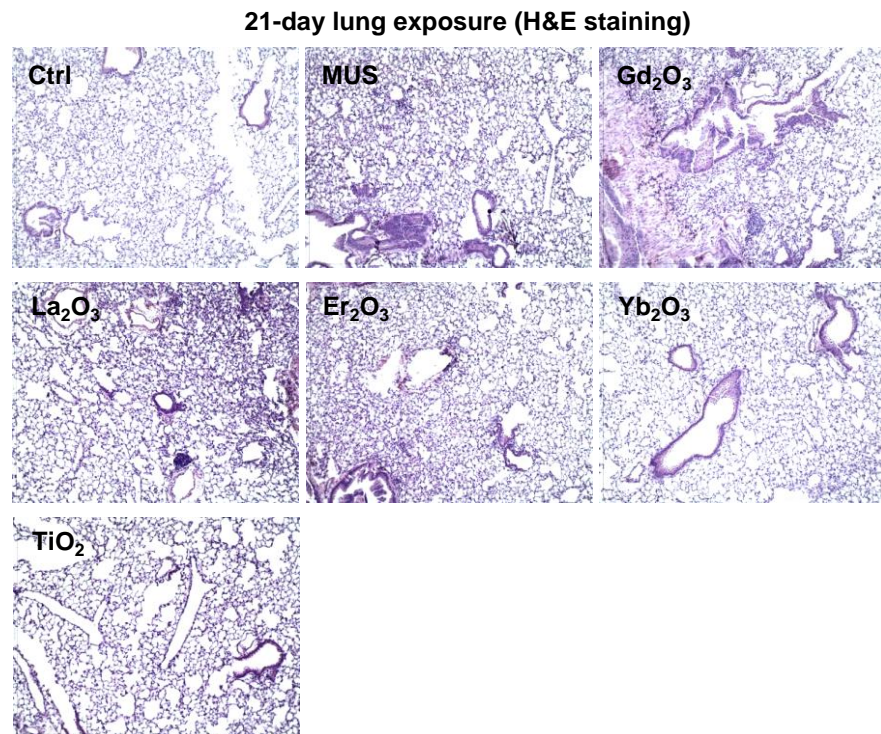

Figure S9

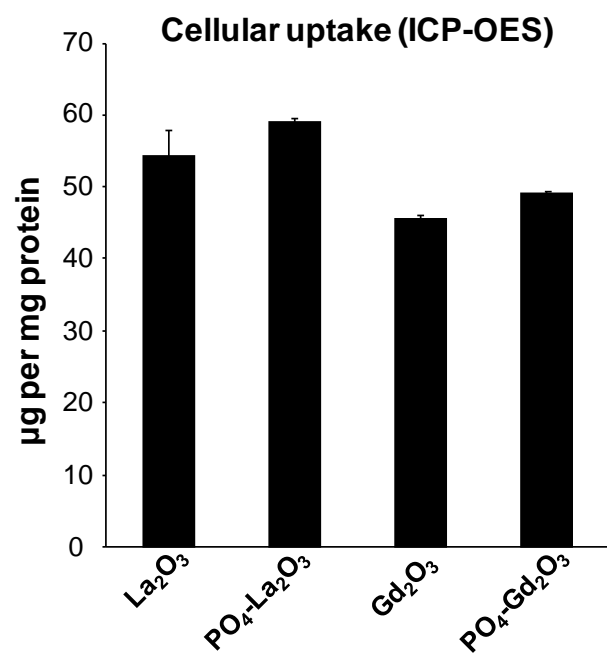

Figure S10

A

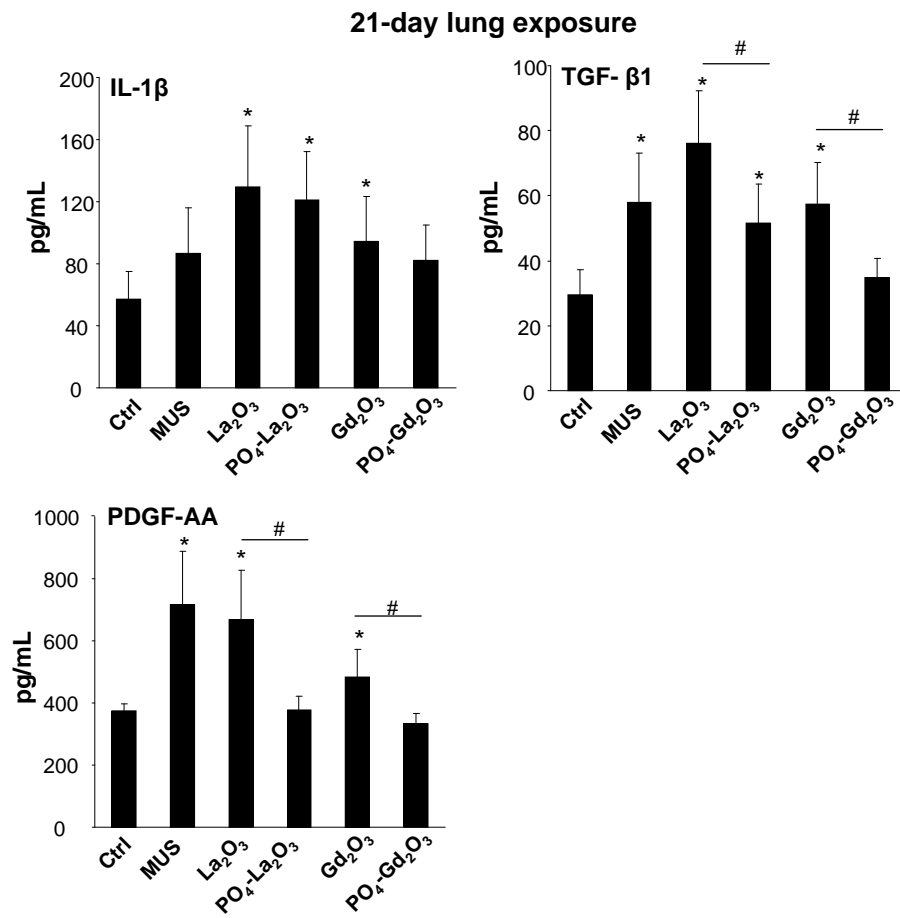

B

21-day lung exposure (Trichrome staining)

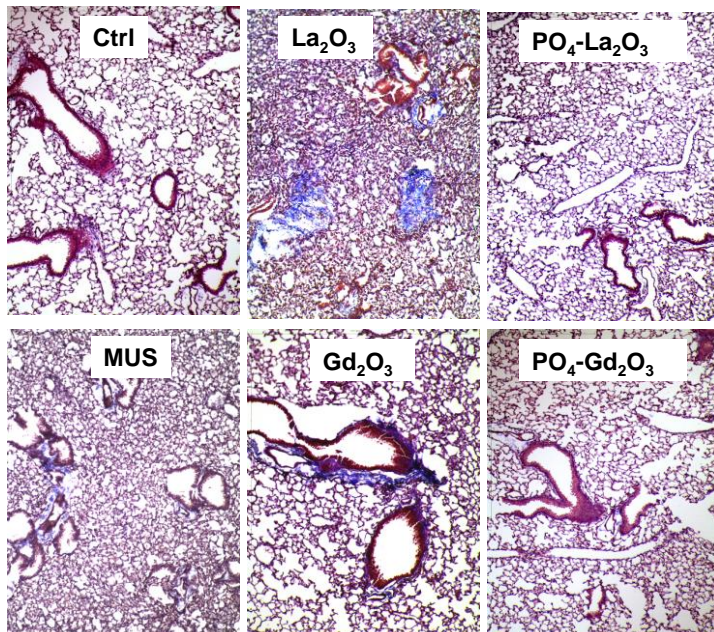

## References

1. Wong, J. P.; Yang, H. M.; Blasetti, K. L.; Schnell, G.; Conley, J. Schofield, L. N. Liposome Delivery of Ciprofloxacin against Intracellular Francisella Tularensis Infection. *J. Control. Release* **2003**, *92*, 265-273.
2. Li, R.; Wang, X.; Ji, Z.; Sun, B.; Zhang, H.; Chang, C. H.; Lin, S.; Meng, H.; Liao, Y. P.; Wang, M.; *et al.* Surface Charge and Cellular Processing of Covalently Functionalized Multiwall Carbon Nanotubes Determine Pulmonary Toxicity. *Acs Nano* **2013**, *7*, 2352-2368.
3. Wang, X.; Xia, T.; Duch, M. C.; Ji, Z. X.; Zhang, H. Y.; Li, R. B.; Sun, B. B.; Lin, S. J.; Meng, H.; Liao, Y. P.; *et al.* Pluronic F108 Coating Decreases the Lung Fibrosis Potential of Multiwall Carbon Nanotubes by Reducing Lysosomal Injury. *Nano Lett.* **2012**, *12*, 3050-3061.
4. Wang, X.; Ji, Z.; Chang, C. H.; Zhang, H.; Wang, M.; Liao, Y. P.; Lin, S.; Meng, H.; Li, R.; Sun, B.; *et al.* Use of Coated Silver Nanoparticles to Understand the Relationship of Particle Dissolution and Bioavailability to Cell and Lung Toxicological Potential. *Small* **2013**.
